# Supplementary material for: Analysis of viral diversity for vaccine target discovery
Source: PubMed Central journal article supplement (PMC5763473; doi:10.1186/s12920-017-0301-2), 2017-12-21
Supplement: 12920_2017_301_MOESM1_ESM.pdf [file 12920_2017_301_MOESM1_ESM.pdf]

**Additional File 1: Table S1.** Entropy and variant analysis data from a specific region of HIV-1 clade B envelope protein (Env).

| Position | Nonamers analysed <sup>*#</sup> |                              | Index nonamer <sup>c</sup> |                     | Variants of the index nonamers <sup>d</sup> |                             |                                                |
|----------|---------------------------------|------------------------------|----------------------------|---------------------|---------------------------------------------|-----------------------------|------------------------------------------------|
|          | No. <sup>a</sup>                | Nonamer entropy <sup>b</sup> | Sequence                   | Incidence [No. (%)] | Total Incidence [No. (%)]                   | Distinct <sup>e</sup> [No.] | Major variant incidence <sup>f</sup> [No. (%)] |
| 397-405  | 3968                            | 1.7                          | FNCGGEFFFY                 | 3107 (~78)          | 861 (~22)                                   | 106                         | 281 (~7)                                       |
| 398-406  | 3960                            | 1.7                          | NCGGEFFFYC                 | 3118 (~79)          | 842 (~21)                                   | 107                         | 282 (~7)                                       |
| 399-407  | 3902                            | 2.0                          | CGGEFFFYCN                 | 2875 (~74)          | 1027 (~26)                                  | 108                         | 273 (~7)                                       |
| 400-408  | 3902                            | 2.8                          | GGEFFFYCNT                 | 1849 (~47)          | 2053 (~53)                                  | 131                         | 1028 (~26)                                     |
| 401-409  | 3901                            | 3.0                          | GEFFFYCNTT                 | 1831 (~47)          | 2070 (~53)                                  | 142                         | 794 (~20)                                      |
| 402-410  | 3898                            | 4.7                          | EFFYCNTTQ                  | 800 (~21)           | 3098 (~79)                                  | 236                         | 453 (~12)                                      |
| 403-411  | 3898                            | 4.7                          | FFYCNTTQL                  | 805 (~21)           | 3093 (~79)                                  | 225                         | 456 (~12)                                      |
| 404-412  | 3898                            | 4.7                          | FYCNTTQLF                  | 810 (~21)           | 3088 (~79)                                  | 224                         | 458 (~12)                                      |
| 405-413  | 3897                            | 4.9                          | YCNTTQLFN                  | 796 (~20)           | 3101 (~80)                                  | 260                         | 449 (~12)                                      |
| 406-414  | 3726                            | 5.1                          | CNTTQLFNS                  | 717 (~19)           | 3009 (~81)                                  | 265                         | 429 (~12)                                      |
| 407-415  | 3737                            | 5.5                          | NTTQLFNST                  | 607 (~16)           | 3130 (~84)                                  | 320                         | 416 (~11)                                      |
| 408-416  | 3732                            | 5.2                          | TTQLFNSTW                  | 665 (~18)           | 3067 (~82)                                  | 298                         | 424 (~11)                                      |
| 409-417  | 3727                            | 6.5                          | TQLFNSTWN                  | 539 (~14)           | 3188 (~86)                                  | 426                         | 306 (~8)                                       |
| 410-418  | 3725                            | 7.7                          | PLFNSTWGS                  | 262 (~7)            | 3463 (~93)                                  | 603                         | 160 (~4)                                       |
| 411-419  | 3701                            | 7.3                          | LFNSTWGSN                  | 261 (~7)            | 3440 (~93)                                  | 518                         | 246 (~7)                                       |
| 412-420  | 3635                            | 8.3                          | FNSTWGSND                  | 257 (~7)            | 3378 (~93)                                  | 694                         | 88 (~2)                                        |
| 413-421  | 3633                            | 8.6                          | NSTWGSNDS                  | 189 (~5)            | 3444 (~95)                                  | 800                         | 67 (~2)                                        |
| 414-422  | 3632                            | 8.9                          | STWGSNDSR                  | 161 (~4)            | 3471 (~96)                                  | 875                         | 67 (~2)                                        |
| 415-423  | 3630                            | 9.0                          | TWGSNDSRP                  | 159 (~4)            | 3471 (~96)                                  | 942                         | 63 (~2)                                        |
| 416-424  | 3628                            | 9.1                          | WGSNDSRPE                  | 157 (~4)            | 3471 (~96)                                  | 984                         | 63 (~2)                                        |
| 417-425  | 3613                            | 9.2                          | GSNDSRPEN                  | 155 (~4)            | 3458 (~96)                                  | 1019                        | 63 (~2)                                        |
| 418-426  | 3610                            | 9.1                          | SNDSRPENN                  | 192 (~5)            | 3418 (~95)                                  | 993                         | 63 (~2)                                        |
| 419-427  | 3595                            | 9.1                          | NDSRPENNT                  | 212 (~6)            | 3383 (~94)                                  | 966                         | 63 (~2)                                        |
| 420-428  | 3567                            | 9.1                          | DSRPENNTG                  | 212 (~6)            | 3355 (~94)                                  | 983                         | 63 (~2)                                        |
| 421-429  | 3346                            | 9.1                          | SRPENNTGG                  | 209 (~6)            | 3137 (~94)                                  | 924                         | 63 (~2)                                        |
| 422-430  | 3055                            | 9.1                          | RPENNTGGN                  | 254 (~8)            | 2801 (~92)                                  | 840                         | 63 (~2)                                        |
| 423-431  | 2411                            | 8.9                          | PENNTGGNE                  | 308 (~13)           | 2103 (~87)                                  | 629                         | 60 (~2)                                        |
| 424-432  | 1945                            | 9.0                          | ENNTGGNET                  | 289 (~15)           | 1656 (~85)                                  | 493                         | 60 (~3)                                        |
| 425-433  | 1232                            | 8.9                          | SENTTGNGT                  | 60 (~5)             | 1172 (~95)                                  | 363                         | 38 (~3)                                        |
| 426-434  | 825                             | 8.8                          | TEVKNNTEG                  | 38 (~5)             | 787 (~95)                                   | 256                         | 28 (~3)                                        |

<sup>a</sup> The total number of HIV-1 clade B protein sequences obtained at the respective nonamer positions of the protein sequence alignment. The number of sequences for each nonamer position varies due to the inclusion of both partial and full-length sequences.

<sup>b</sup> Shannon's nonamer entropy.

<sup>c</sup> The index nonamer is the peptide with the highest incidence at a given nonamer position in the protein alignment.

<sup>d</sup> Variants of the index nonamers are all sequences that differ by one or more amino acids from the index nonamer at the corresponding position in the protein alignment.

<sup>e</sup> The number of distinct variants at the indicated nonamer position.

<sup>f</sup> The major variant is the most common (highest incidence) variant nonamer of all analyzed nonamers at the indicated nonamer position of the protein alignment.

\* An example interpretation of the table: The index nonamer FNCGGEFFY was present in 3107 sequences (~ 78%) of all 3968 sequences analyzed at nonamer position 397-405 in the Env protein alignment. The remaining 861 sequences (~ 22%) at that position were variants of the index nonamer and comprised 106 distinct peptides, one of which is the major variant and is present in about 7% (281) of all the 3968 analysed sequences. The remaining 105 distinct variants at the position were represented by 580 additional variant sequences.

# This example shows a region of lower entropy, positions 397-405 : 398-406 with entropy below 2.0, which is connected to positions 412-420 : 426-434, a region of high diversity (entropy above 8.0), by a transitional region of intermediate entropy.
